# Supplementary material
Source: PubMed Central journal article supplement (PMC4124045)
Supplement: NIHMS603311-supplement-07.pdf [file NIHMS603311-supplement-07.pdf]

1  
2  
3  
4  
5  
6  
7  
8  
9  
10  
11  
12  
13  
14  
15  
16  
17  
18  
19  
20  
21  
22  
23  
24  
25  
26  
27  
28  
29  
30  
31  
32  
33  
34  
35  
36  
37  
38  
39  
40  
41  
42  
43  
44  
45  
46  
47  
48  
49  
50  
51  
52  
53  
54  
55  
56  
57  
58  
59  
60  
61  
62  
63  
64  
65

**Supporting Information**

**Figure S1.** H3 Bayes factor (BF) test for significant non-zero rates. A cutoff of BF = 3 was used. The darker the color indicates the higher BF (pink to red). The most significant route is Alaska → Oregon (Pacific flyway) with BF = 45.05.

**Figure S2.** H4 BF. The most significant route is Alberta → New Mexico (Central flyway) with BF = 21.14.

**Figure S3.** H6 BF. The most significant route is AB → OH (cross-flyways) with BF=1,654.

**Figure S4.** H8 BF. The most significant route is AK → CA (Pacific flyway) with BF = 29.04.

**Figure S5.** H11 BF. The most significant route is NJ → DE (Atlantic flyway) with BF=32,412.

**Table S1.** Log (ln) marginal likelihoods by HA type for strict and relaxed clock models.

| Subtype | Strict Clock | Relaxed Clock |
|---------|--------------|---------------|
| H3      | -21,321.39   | -18,737.71    |
| H4      | -9,541.91    | -8,974.77     |
| H6      | -25,030.61   | -24,195.84    |
| H8      | -8,300.93    | -7,813.40     |
| H11     | -15,564.60   | -14,947.28    |

**Table S2.** Bayes factor results for each subtype.

| Subtype | Origin | Destination | Flyway        | Bayes factor |
|---------|--------|-------------|---------------|--------------|
| H3      | AK     | OR          | Pacific       | 45.06        |
|         | OH     | MI          | Mississippi   | 40.61        |
|         | TX     | LA          | Inter-flyways | 37.49        |

|    |    |    |               |       |
|----|----|----|---------------|-------|
| 1  |    |    |               |       |
| 2  |    |    |               |       |
| 3  |    |    |               |       |
| 4  | MN | SD | Inter-flyways | 27.86 |
| 5  |    |    |               |       |
| 6  | CA | OR | Pacific       | 27.44 |
| 7  |    |    |               |       |
| 8  | SD | AK | Inter-flyways | 22.61 |
| 9  |    |    |               |       |
| 10 | DE | AB | Inter-flyways | 15.84 |
| 11 |    |    |               |       |
| 12 | LA | TX | Inter-flyways | 14.45 |
| 13 |    |    |               |       |
| 14 | MS | DE | Inter-flyways | 13.78 |
| 15 |    |    |               |       |
| 16 | NB | NS | Atlantic      | 13.04 |
| 17 |    |    |               |       |
| 18 | SD | ND | Central       | 12.7  |
| 19 |    |    |               |       |
| 20 | AB | SD | Central       | 11.51 |
| 21 |    |    |               |       |
| 22 | ND | TX | Central       | 10.54 |
| 23 |    |    |               |       |
| 24 | NM | ND | Central       | 10.43 |
| 25 |    |    |               |       |
| 26 | WI | IA | Mississippi   | 9.6   |
| 27 |    |    |               |       |
| 28 | WA | AB | Inter-flyways | 8.67  |
| 29 |    |    |               |       |
| 30 | LA | MN | Mississippi   | 8.63  |
| 31 |    |    |               |       |
| 32 | SD | MN | Inter-flyways | 8.53  |
| 33 |    |    |               |       |
| 34 | BC | CA | Pacific       | 8.5   |
| 35 |    |    |               |       |
| 36 | BC | AB | Inter-flyways | 8.36  |
| 37 |    |    |               |       |
| 38 | IA | WI | Mississippi   | 7.45  |
| 39 |    |    |               |       |
| 40 | BC | WA | Pacific       | 7.38  |
| 41 |    |    |               |       |
| 42 | NS | NB | Atlantic      | 7.35  |
| 43 |    |    |               |       |
| 44 | MD | WA | Inter-flyways | 7.07  |
| 45 |    |    |               |       |
| 46 | IL | MS | Mississippi   | 7.01  |
| 47 |    |    |               |       |
| 48 | WA | CA | Pacific       | 6.91  |
| 49 |    |    |               |       |
| 50 | WI | IL | Mississippi   | 6.88  |
| 51 |    |    |               |       |
| 52 | ND | NB | Inter-flyways | 6.78  |
| 53 |    |    |               |       |
| 54 |    |    |               |       |
| 55 |    |    |               |       |
| 56 |    |    |               |       |
| 57 |    |    |               |       |
| 58 |    |    |               |       |
| 59 |    |    |               |       |
| 60 |    |    |               |       |
| 61 |    |    |               |       |
| 62 |    |    |               |       |
| 63 |    |    |               |       |
| 64 |    |    |               |       |
| 65 |    |    |               |       |

|    |    |    |               |      |
|----|----|----|---------------|------|
| 1  |    |    |               |      |
| 2  |    |    |               |      |
| 3  |    |    |               |      |
| 4  | CA | SD | Inter-flyways | 6.75 |
| 5  |    |    |               |      |
| 6  | AB | BC | Inter-flyways | 6.61 |
| 7  |    |    |               |      |
| 8  |    |    |               |      |
| 9  | MN | ND | Central       | 6.36 |
| 10 |    |    |               |      |
| 11 | OR | LA | Inter-flyways | 5.94 |
| 12 |    |    |               |      |
| 13 | AB | CA | Inter-flyways | 5.91 |
| 14 |    |    |               |      |
| 15 | NB | OH | Inter-flyways | 5.66 |
| 16 |    |    |               |      |
| 17 | AB | OR | Inter-flyways | 5.65 |
| 18 |    |    |               |      |
| 19 |    |    |               |      |
| 20 | OR | ND | Inter-flyways | 5.21 |
| 21 |    |    |               |      |
| 22 | OR | CA | Pacific       | 5.18 |
| 23 |    |    |               |      |
| 24 | WA | OR | Pacific       | 5.16 |
| 25 |    |    |               |      |
| 26 | NS | OH | Inter-flyways | 4.72 |
| 27 |    |    |               |      |
| 28 |    |    |               |      |
| 29 | SD | TX | Central       | 4.66 |
| 30 |    |    |               |      |
| 31 | NS | WI | Inter-flyways | 4.6  |
| 32 |    |    |               |      |
| 33 | OR | BC | Pacific       | 4.6  |
| 34 |    |    |               |      |
| 35 | NB | MN | Inter-flyways | 4.56 |
| 36 |    |    |               |      |
| 37 | WI | MO | Mississippi   | 4.41 |
| 38 |    |    |               |      |
| 39 |    |    |               |      |
| 40 | NS | IA | Inter-flyways | 4.26 |
| 41 |    |    |               |      |
| 42 | NB | SK | Inter-flyways | 4.25 |
| 43 |    |    |               |      |
| 44 | NB | MD | Atlantic      | 4.18 |
| 45 |    |    |               |      |
| 46 |    |    |               |      |
| 47 | WA | BC | Pacific       | 4.1  |
| 48 |    |    |               |      |
| 49 | BC | AK | Pacific       | 3.98 |
| 50 |    |    |               |      |
| 51 | AZ | MS | Inter-flyways | 3.98 |
| 52 |    |    |               |      |
| 53 | OR | AZ | Pacific       | 3.92 |
| 54 |    |    |               |      |
| 55 |    |    |               |      |
| 56 | IA | MS | Mississippi   | 3.79 |
| 57 |    |    |               |      |
| 58 | TX | MN | Inter-flyways | 3.78 |
| 59 |    |    |               |      |
| 60 |    |    |               |      |
| 61 |    |    |               |      |
| 62 |    |    |               |      |
| 63 |    |    |               |      |
| 64 |    |    |               |      |
| 65 |    |    |               |      |

1  
2  
3  
4  
5  
6  
7  
8  
9  
10  
11  
12  
13  
14  
15  
16  
17  
18  
19  
20  
21  
22  
23  
24  
25  
26  
27  
28  
29  
30  
31  
32  
33  
34  
35  
36  
37  
38  
39  
40  
41  
42  
43  
44  
45  
46  
47  
48  
49  
50  
51  
52  
53  
54  
55  
56  
57  
58  
59  
60  
61  
62  
63  
64  
65

|    |    |               |      |
|----|----|---------------|------|
| ND | AB | Central       | 3.64 |
| MO | MS | Mississippi   | 3.62 |
| MO | IL | Mississippi   | 3.49 |
| MN | MD | Inter-flyways | 3.41 |
| IL | IA | Mississippi   | 3.36 |
| MI | OH | Mississippi   | 3.29 |
| NS | SK | Inter-flyways | 3.25 |
| LA | MO | Mississippi   | 3.24 |
| IA | NS | Inter-flyways | 3.24 |
| IL | WI | Mississippi   | 3.22 |
| NS | MD | Atlantic      | 3.2  |

H4

|    |    |               |       |
|----|----|---------------|-------|
| AB | NM | Central       | 21.14 |
| NM | TX | Central       | 19.63 |
| TX | MN | Inter-flyways | 18.62 |
| WA | AK | Pacific       | 18.07 |
| AK | WA | Pacific       | 14.5  |
| CA | OR | Pacific       | 12.45 |
| IL | IA | Mississippi   | 11.95 |
| LA | IL | Mississippi   | 11.77 |
| NB | OH | Inter-flyways | 11.51 |
| OR | CA | Pacific       | 10.82 |
| IL | NS | Inter-flyways | 10.07 |
| WA | AB | Inter-flyways | 9.77  |
| TX | MB | Central       | 9.37  |

|    |    |    |               |      |
|----|----|----|---------------|------|
| 1  |    |    |               |      |
| 2  |    |    |               |      |
| 3  |    |    |               |      |
| 4  | IA | MO | Mississippi   | 8.13 |
| 5  |    |    |               |      |
| 6  | IA | NS | Inter-flyways | 7.52 |
| 7  |    |    |               |      |
| 8  |    |    |               |      |
| 9  | NS | MO | Inter-flyways | 7.31 |
| 10 |    |    |               |      |
| 11 | NS | IA | Inter-flyways | 7.12 |
| 12 |    |    |               |      |
| 13 | WI | OH | Mississippi   | 7.08 |
| 14 |    |    |               |      |
| 15 | OH | WI | Mississippi   | 6.95 |
| 16 |    |    |               |      |
| 17 | WI | MN | Mississippi   | 5.72 |
| 18 |    |    |               |      |
| 19 |    |    |               |      |
| 20 | AB | TX | Central       | 5.65 |
| 21 |    |    |               |      |
| 22 | ND | NB | Inter-flyways | 5.47 |
| 23 |    |    |               |      |
| 24 | TX | NM | Central       | 5.36 |
| 25 |    |    |               |      |
| 26 | LA | WI | Mississippi   | 5.22 |
| 27 |    |    |               |      |
| 28 |    |    |               |      |
| 29 | MO | IA | Mississippi   | 5.19 |
| 30 |    |    |               |      |
| 31 | MB | MN | Inter-flyways | 4.98 |
| 32 |    |    |               |      |
| 33 | ND | CA | Inter-flyways | 4.88 |
| 34 |    |    |               |      |
| 35 |    |    |               |      |
| 36 | NB | WI | Inter-flyways | 4.71 |
| 37 |    |    |               |      |
| 38 | MB | SD | Central       | 4.49 |
| 39 |    |    |               |      |
| 40 | MN | WI | Mississippi   | 4.24 |
| 41 |    |    |               |      |
| 42 | MN | LA | Mississippi   | 3.99 |
| 43 |    |    |               |      |
| 44 |    |    |               |      |
| 45 | IL | MO | Mississippi   | 3.94 |
| 46 |    |    |               |      |
| 47 | ND | LA | Inter-flyways | 3.93 |
| 48 |    |    |               |      |
| 49 | MO | OH | Mississippi   | 3.83 |
| 50 |    |    |               |      |
| 51 | MN | SD | Inter-flyways | 3.72 |
| 52 |    |    |               |      |
| 53 | MN | NM | Inter-flyways | 3.64 |
| 54 |    |    |               |      |
| 55 |    |    |               |      |
| 56 | AK | MO | Inter-flyways | 3.63 |
| 57 |    |    |               |      |
| 58 | NM | MB | Central       | 3.56 |
| 59 |    |    |               |      |
| 60 |    |    |               |      |
| 61 |    |    |               |      |
| 62 |    |    |               |      |
| 63 |    |    |               |      |
| 64 |    |    |               |      |
| 65 |    |    |               |      |

1  
2  
3  
4  
5  
6  
7  
8  
9  
10  
11  
12  
13  
14  
15  
16  
17  
18  
19  
20  
21  
22  
23  
24  
25  
26  
27  
28  
29  
30  
31  
32  
33  
34  
35  
36  
37  
38  
39  
40  
41  
42  
43  
44  
45  
46  
47  
48  
49  
50  
51  
52  
53  
54  
55  
56  
57  
58  
59  
60  
61  
62  
63  
64  
65

H6

|    |    |               |          |
|----|----|---------------|----------|
| NM | ND | Central       | 3.45     |
| TX | SD | Central       | 3.32     |
| WI | NB | Inter-flyways | 3.27     |
| OH | AB | Inter-flyways | 3.24     |
| MN | MB | Inter-flyways | 3.19     |
| OR | ND | Inter-flyways | 3.18     |
| MB | ND | Central       | 3.14     |
| MB | TX | Central       | 3.06     |
| ND | IL | Inter-flyways | 3.01     |
| AB | OH | Inter-flyways | 1,653.79 |
| DE | NJ | Atlantic      | 671.75   |
| ON | OH | Mississippi   | 84.62    |
| MD | ON | Inter-flyways | 72.28    |
| CA | NM | Inter-flyways | 65.55    |
| NJ | DE | Atlantic      | 52.83    |
| IL | WI | Mississippi   | 32.17    |
| ND | AB | Central       | 28.38    |
| OH | MN | Mississippi   | 27.16    |
| NM | WA | Inter-flyways | 19.60    |
| NJ | NY | Atlantic      | 16.52    |
| MN | ND | Inter-flyways | 16.20    |
| MS | MO | Mississippi   | 16.05    |
| WI | TX | Inter-flyways | 15.72    |
| NM | MN | Inter-flyways | 13.81    |

|    |    |    |               |       |
|----|----|----|---------------|-------|
| 1  |    |    |               |       |
| 2  |    |    |               |       |
| 3  |    |    |               |       |
| 4  | NY | GA | Atlantic      | 12.81 |
| 5  |    |    |               |       |
| 6  | MN | LA | Mississippi   | 11.88 |
| 7  |    |    |               |       |
| 8  | MO | MS | Mississippi   | 11.60 |
| 9  |    |    |               |       |
| 10 | MN | WI | Mississippi   | 10.65 |
| 11 |    |    |               |       |
| 12 | NS | MS | Inter-flyways | 10.62 |
| 13 |    |    |               |       |
| 14 | WI | IL | Mississippi   | 10.30 |
| 15 |    |    |               |       |
| 16 | NS | MD | Atlantic      | 10.10 |
| 17 |    |    |               |       |
| 18 | MO | NS | Inter-flyways | 9.53  |
| 19 |    |    |               |       |
| 20 | AK | CA | Pacific       | 9.01  |
| 21 |    |    |               |       |
| 22 | NM | IL | Inter-flyways | 8.26  |
| 23 |    |    |               |       |
| 24 | ND | WI | Inter-flyways | 8.21  |
| 25 |    |    |               |       |
| 26 | LA | WI | Mississippi   | 7.86  |
| 27 |    |    |               |       |
| 28 | NJ | GA | Atlantic      | 7.55  |
| 29 |    |    |               |       |
| 30 | ND | TX | Central       | 7.37  |
| 31 |    |    |               |       |
| 32 | WA | SD | Inter-flyways | 7.33  |
| 33 |    |    |               |       |
| 34 | ND | CA | Inter-flyways | 7.07  |
| 35 |    |    |               |       |
| 36 | GA | NY | Atlantic      | 6.80  |
| 37 |    |    |               |       |
| 38 | NY | PA | Atlantic      | 6.33  |
| 39 |    |    |               |       |
| 40 | MS | NS | Inter-flyways | 6.23  |
| 41 |    |    |               |       |
| 42 | WA | CA | Pacific       | 6.04  |
| 43 |    |    |               |       |
| 44 | CA | WA | Pacific       | 5.89  |
| 45 |    |    |               |       |
| 46 | MO | MD | Inter-flyways | 5.74  |
| 47 |    |    |               |       |
| 48 | PA | GA | Atlantic      | 5.52  |
| 49 |    |    |               |       |
| 50 | PA | AB | Inter-flyways | 5.48  |
| 51 |    |    |               |       |
| 52 | ND | LA | Inter-flyways | 5.36  |
| 53 |    |    |               |       |
| 54 |    |    |               |       |
| 55 |    |    |               |       |
| 56 |    |    |               |       |
| 57 |    |    |               |       |
| 58 |    |    |               |       |
| 59 |    |    |               |       |
| 60 |    |    |               |       |
| 61 |    |    |               |       |
| 62 |    |    |               |       |
| 63 |    |    |               |       |
| 64 |    |    |               |       |
| 65 |    |    |               |       |

|    |    |    |               |      |
|----|----|----|---------------|------|
| 1  |    |    |               |      |
| 2  |    |    |               |      |
| 3  |    |    |               |      |
| 4  | GA | PA | Atlantic      | 5.07 |
| 5  |    |    |               |      |
| 6  | WI | NJ | Inter-flyways | 5.04 |
| 7  |    |    |               |      |
| 8  |    |    |               |      |
| 9  | TX | NJ | Inter-flyways | 4.86 |
| 10 |    |    |               |      |
| 11 | NM | SD | Central       | 4.86 |
| 12 |    |    |               |      |
| 13 | TX | MO | Inter-flyways | 4.79 |
| 14 |    |    |               |      |
| 15 | TX | CA | Inter-flyways | 4.77 |
| 16 |    |    |               |      |
| 17 | TX | AB | Central       | 4.74 |
| 18 |    |    |               |      |
| 19 |    |    |               |      |
| 20 | WA | IL | Inter-flyways | 4.59 |
| 21 |    |    |               |      |
| 22 | LA | TX | Inter-flyways | 4.49 |
| 23 |    |    |               |      |
| 24 | OH | ON | Mississippi   | 4.48 |
| 25 |    |    |               |      |
| 26 | CA | MN | Inter-flyways | 4.13 |
| 27 |    |    |               |      |
| 28 |    |    |               |      |
| 29 | TX | MS | Inter-flyways | 4.00 |
| 30 |    |    |               |      |
| 31 | SD | MN | Inter-flyways | 3.97 |
| 32 |    |    |               |      |
| 33 | MS | MD | Inter-flyways | 3.96 |
| 34 |    |    |               |      |
| 35 |    |    |               |      |
| 36 | NM | ND | Central       | 3.90 |
| 37 |    |    |               |      |
| 38 | ON | MN | Mississippi   | 3.89 |
| 39 |    |    |               |      |
| 40 | GA | AB | Inter-flyways | 3.78 |
| 41 |    |    |               |      |
| 42 | WA | AK | Pacific       | 3.64 |
| 43 |    |    |               |      |
| 44 | MD | OH | Inter-flyways | 3.54 |
| 45 |    |    |               |      |
| 46 |    |    |               |      |
| 47 | CA | SD | Inter-flyways | 3.54 |
| 48 |    |    |               |      |
| 49 | IL | NS | Inter-flyways | 3.46 |
| 50 |    |    |               |      |
| 51 | SD | NM | Central       | 3.44 |
| 52 |    |    |               |      |
| 53 | WI | SD | Inter-flyways | 3.43 |
| 54 |    |    |               |      |
| 55 |    |    |               |      |
| 56 | SD | WA | Inter-flyways | 3.34 |
| 57 |    |    |               |      |
| 58 | OH | LA | Mississippi   | 3.33 |
| 59 |    |    |               |      |
| 60 |    |    |               |      |
| 61 |    |    |               |      |
| 62 |    |    |               |      |
| 63 |    |    |               |      |
| 64 |    |    |               |      |
| 65 |    |    |               |      |



1  
2  
3  
4  
5  
6  
7  
8  
9  
10  
11  
12  
13  
14  
15  
16  
17  
18  
19  
20  
21  
22  
23  
24  
25  
26  
27  
28  
29  
30  
31  
32  
33  
34  
35  
36  
37  
38  
39  
40  
41  
42  
43  
44  
45  
46  
47  
48  
49  
50  
51  
52  
53  
54  
55  
56  
57  
58  
59  
60  
61  
62  
63  
64  
65

H8

|    |    |               |       |
|----|----|---------------|-------|
| SD | IL | Inter-flyways | 3.25  |
| AK | PA | Inter-flyways | 3.22  |
| LA | MN | Mississippi   | 3.14  |
| LA | CA | Inter-flyways | 3.09  |
| AK | CA | Pacific       | 29.04 |
| AB | AK | Inter-flyways | 6.65  |
| CA | AZ | Pacific       | 5.72  |
| LA | AB | Inter-flyways | 5.49  |
| MN | IL | Mississippi   | 5.02  |
| AB | LA | Inter-flyways | 3.32  |
| CA | MN | Inter-flyways | 3.27  |

H11

|    |    |               |           |
|----|----|---------------|-----------|
| NJ | DE | Atlantic      | 32,411.72 |
| CA | AK | Pacific       | 412.94    |
| DE | NJ | Atlantic      | 151.64    |
| TN | AB | Inter-flyways | 104.48    |
| MO | CA | Inter-flyways | 32.21     |
| MD | NC | Atlantic      | 25.21     |
| AB | NY | Inter-flyways | 15.99     |
| QC | NB | Atlantic      | 15.70     |
| WA | MO | Inter-flyways | 14.50     |
| AK | MN | Inter-flyways | 12.33     |
| OH | QC | Inter-flyways | 11.92     |
| MD | OH | Inter-flyways | 11.90     |

|    |    |    |               |       |
|----|----|----|---------------|-------|
| 1  |    |    |               |       |
| 2  |    |    |               |       |
| 3  |    |    |               |       |
| 4  | AB | MN | Inter-flyways | 11.67 |
| 5  |    |    |               |       |
| 6  | MN | NJ | Inter-flyways | 11.31 |
| 7  |    |    |               |       |
| 8  | NY | MN | Inter-flyways | 10.59 |
| 9  |    |    |               |       |
| 10 | AB | OH | Inter-flyways | 7.79  |
| 11 |    |    |               |       |
| 12 | MO | AZ | Inter-flyways | 7.38  |
| 13 |    |    |               |       |
| 14 | NY | OH | Inter-flyways | 6.62  |
| 15 |    |    |               |       |
| 16 | NB | LA | Inter-flyways | 6.29  |
| 17 |    |    |               |       |
| 18 | NC | QC | Atlantic      | 6.16  |
| 19 |    |    |               |       |
| 20 | AZ | MO | Inter-flyways | 5.77  |
| 21 |    |    |               |       |
| 22 | AZ | NM | Inter-flyways | 5.42  |
| 23 |    |    |               |       |
| 24 | MN | WA | Inter-flyways | 5.36  |
| 25 |    |    |               |       |
| 26 | WA | AZ | Pacific       | 5.02  |
| 27 |    |    |               |       |
| 28 | LA | TN | Mississippi   | 4.78  |
| 29 |    |    |               |       |
| 30 | NC | OH | Inter-flyways | 4.78  |
| 31 |    |    |               |       |
| 32 | MO | NL | Inter-flyways | 4.65  |
| 33 |    |    |               |       |
| 34 | MO | WA | Inter-flyways | 4.57  |
| 35 |    |    |               |       |
| 36 | NL | NM | Inter-flyways | 4.49  |
| 37 |    |    |               |       |
| 38 | AZ | NL | Inter-flyways | 4.48  |
| 39 |    |    |               |       |
| 40 | MD | QC | Atlantic      | 4.37  |
| 41 |    |    |               |       |
| 42 | OH | LA | Mississippi   | 4.32  |
| 43 |    |    |               |       |
| 44 | NM | NL | Inter-flyways | 4.26  |
| 45 |    |    |               |       |
| 46 | WA | CA | Pacific       | 4.13  |
| 47 |    |    |               |       |
| 48 | MN | MD | Inter-flyways | 3.99  |
| 49 |    |    |               |       |
| 50 | QC | OH | Inter-flyways | 3.76  |
| 51 |    |    |               |       |
| 52 | MN | NY | Inter-flyways | 3.67  |
| 53 |    |    |               |       |
| 54 |    |    |               |       |
| 55 |    |    |               |       |
| 56 |    |    |               |       |
| 57 |    |    |               |       |
| 58 |    |    |               |       |
| 59 |    |    |               |       |
| 60 |    |    |               |       |
| 61 |    |    |               |       |
| 62 |    |    |               |       |
| 63 |    |    |               |       |
| 64 |    |    |               |       |
| 65 |    |    |               |       |

1  
2  
3  
4  
5  
6  
7  
8  
9  
10  
11  
12  
13  
14  
15  
16  
17  
18  
19  
20  
21  
22  
23  
24  
25  
26  
27  
28  
29  
30  
31  
32  
33  
34  
35  
36  
37  
38  
39  
40  
41  
42  
43  
44  
45  
46  
47  
48  
49  
50  
51  
52  
53  
54  
55  
56  
57  
58  
59  
60  
61  
62  
63  
64  
65

|    |    |               |      |
|----|----|---------------|------|
| NY | WA | Inter-flyways | 3.66 |
| NY | NJ | Atlantic      | 3.65 |
| AB | WA | Inter-flyways | 3.52 |
| OH | MD | Inter-flyways | 3.50 |
| AK | NM | Inter-flyways | 3.23 |
| LA | MD | Inter-flyways | 3.21 |
